# Supplementary material
Source: publisher site journal article supplement (https://www.spandidos-publications.com/1784/downloadSupplementary)

Figure S1. Pearson's pairwise correlation plot for miR-28-5p vs. WSB2 expression in triple-negative breast cancer.

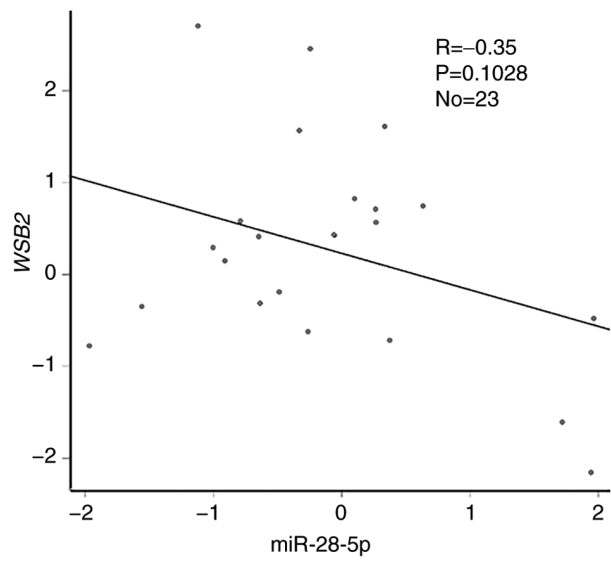

Supplement: Supplementary file 1 [file downloadSupplementary]
